# Supplementary material for: Association Between Intravenous Thrombolysis and Clinical Outcomes Among Patients With Ischemic Stroke and Unsuccessful Mechanical Reperfusion
Source: PubMed Central journal article supplement — JAMA Netw Open. 2023 May 1;6(5):e2310213. doi: 10.1001/jamanetworkopen.2023.10213 (PMC10152307; doi:10.1001/jamanetworkopen.2023.10213), 2023-05-01
Supplement: jamanetwopen-e2310213-s002.pdf [file jamanetwopen-e2310213-s002.pdf]

\*First name, last name, and suffix (if applicable) are required and will appear in PubMed.

| <b>*Group Name(s): German Stroke Registry–Endovascular Treatment Investigators</b> |                   |                              |                  |                                                              |                                          |                                                         |                                                                                            |
|------------------------------------------------------------------------------------|-------------------|------------------------------|------------------|--------------------------------------------------------------|------------------------------------------|---------------------------------------------------------|--------------------------------------------------------------------------------------------|
| <b>*First Name and Middle Initial(s)</b>                                           | <b>*Last Name</b> | <b>*Suffix (eg, Jr, III)</b> | Academic Degrees | Institution                                                  | Location (city, state/province, country) | Role or Contribution, eg, chair, principal investigator | Group (if more than 1 Group listed in the byline) and/or Subgroup (eg, Steering Committee) |
| Anna                                                                               | Allegiani         |                              |                  | Asklepios Klinik Altona                                      |                                          |                                                         |                                                                                            |
| Jörg                                                                               | Berrouschot       |                              |                  | Klinikum Altenburger Land                                    |                                          |                                                         |                                                                                            |
| Tobias                                                                             | Boeckh-Behrens    |                              |                  | Klinikum rechts der Isar der Technischen Universität München |                                          |                                                         |                                                                                            |
| Georg                                                                              | Bohner            |                              |                  | Charité Berlin                                               |                                          |                                                         |                                                                                            |
| Jan                                                                                | Borggrefe         |                              |                  | Johannes Wesling Klinikum Minden                             |                                          |                                                         |                                                                                            |
| Albrecht                                                                           | Bormann           |                              |                  | Klinikum Altenburger Land                                    |                                          |                                                         |                                                                                            |
| Michael                                                                            | Braun             |                              |                  | Bezirkskrankenhaus Günzburg                                  |                                          |                                                         |                                                                                            |
| Franziska                                                                          | Dorn              |                              |                  | Universitätsklinikum Bonn                                    |                                          |                                                         |                                                                                            |
| Bernd                                                                              | Eckert            |                              |                  | Asklepios Klinik Altona                                      |                                          |                                                         |                                                                                            |
| Ulrike                                                                             | Ernemann          |                              |                  | Universitätsklinik Tübingen                                  |                                          |                                                         |                                                                                            |
| Marielle                                                                           | Ernst             |                              |                  | Georg-August-Universität Göttingen                           |                                          |                                                         |                                                                                            |
| Jens                                                                               | Fiehler           |                              |                  | UKE Hamburg-Eppendorf                                        |                                          |                                                         |                                                                                            |
| Christian                                                                          | Gerloff           |                              |                  | UKE Hamburg-Eppendorf                                        |                                          |                                                         |                                                                                            |
| Klaus                                                                              | Gröschel          |                              |                  | Uniklinik Mainz                                              |                                          |                                                         |                                                                                            |
| Gerhard F.                                                                         | Hamann            |                              |                  | Bezirkskrankenhaus Günzburg                                  |                                          |                                                         |                                                                                            |
| Jörg                                                                               | Hattingen         |                              |                  | Klinikum Nordstadt                                           |                                          |                                                         |                                                                                            |
| Karl-Heinz                                                                         | Henn              |                              |                  | Klinikum Offenbach                                           |                                          |                                                         |                                                                                            |
| Fee                                                                                | Keil              |                              |                  | Uniklinik Frankfurt/Main                                     |                                          |                                                         |                                                                                            |
| Lars                                                                               | Kellert           |                              |                  | LMU Klinikum                                                 |                                          |                                                         |                                                                                            |
| Christoffer                                                                        | Kraemer           |                              |                  | Klinikum Lüneburg                                            |                                          |                                                         |                                                                                            |
| Hannes                                                                             | Leischner         |                              |                  | Klinikum Lüneburg                                            |                                          |                                                         |                                                                                            |
| Jan                                                                                | Liman             |                              |                  | Georg-August-Universität Göttingen                           |                                          |                                                         |                                                                                            |
| Alexander                                                                          | Ludolf            |                              |                  | Klinikum Offenbach                                           |                                          |                                                         |                                                                                            |
| Christian                                                                          | Nolte             |                              |                  | Charité Berlin                                               |                                          |                                                         |                                                                                            |
| Omid                                                                               | Nikoubashman      |                              |                  | Uniklinik RWTH Aachen                                        |                                          |                                                         |                                                                                            |
| Martina                                                                            | Petersen          |                              |                  | Klinikum Osnabrück                                           |                                          |                                                         |                                                                                            |
| Gabor                                                                              | Petzold           |                              |                  | Universitätsklinikum Bonn                                    |                                          |                                                         |                                                                                            |
| Sven                                                                               | Poli              |                              |                  | Universitätsklinik Tübingen                                  |                                          |                                                         |                                                                                            |

## Supplemental Online Content: Nonauthor Collaborators

\*First name, last name, and suffix (if applicable) are required and will appear in PubMed.

| *First Name and Middle Initial(s) | *Last Name  | *Suffix (eg, Jr, III) | Academic Degrees | Institution                                                  | Location (city, state/province, country) | Role or Contribution, eg, chair, principal investigator | Group (if more than 1 Group listed in the byline) and/or Subgroup (eg, Steering Committee) |
|-----------------------------------|-------------|-----------------------|------------------|--------------------------------------------------------------|------------------------------------------|---------------------------------------------------------|--------------------------------------------------------------------------------------------|
| Arno                              | Reich       |                       |                  | Uniklinik RWTH Aachen                                        |                                          |                                                         |                                                                                            |
| Joachim                           | Röther      |                       |                  | Asklepios Klinik Altona                                      |                                          |                                                         |                                                                                            |
| Jan Hendrik                       | Schäfer     |                       |                  | Uniklinik Frankfurt/Main                                     |                                          |                                                         |                                                                                            |
| Maximilian                        | Schell      |                       |                  | UKE Hamburg-Eppendorf                                        |                                          |                                                         |                                                                                            |
| Peter                             | Schellinger |                       |                  | Johannes Wesling Klinikum Minden                             |                                          |                                                         |                                                                                            |
| Eberhard                          | Siebert     |                       |                  | Charité Berlin                                               |                                          |                                                         |                                                                                            |
| Florian                           | Stögbauer   |                       |                  | Klinikum Osnabrück                                           |                                          |                                                         |                                                                                            |
| Götz                              | Thomalla    |                       |                  | UKE Hamburg-Eppendorf                                        |                                          |                                                         |                                                                                            |
| Steffen                           | Tiedt       |                       |                  | LMU Klinikum                                                 |                                          |                                                         |                                                                                            |
| Christoph                         | Trumm       |                       |                  | LMU Klinikum                                                 |                                          |                                                         |                                                                                            |
| Timo                              | Uphaus      |                       |                  | Uniklinik Mainz                                              |                                          |                                                         |                                                                                            |
| Silke                             | Wunderlich  |                       |                  | Klinikum rechts der Isar der Technischen Universität München |                                          |                                                         |                                                                                            |
| Sarah                             | Zweynert    |                       |                  | Charité Berlin                                               |                                          |                                                         |                                                                                            |
