# Supplementary material for: Association Between Intravenous Thrombolysis and Clinical Outcomes Among Patients With Ischemic Stroke and Unsuccessful Mechanical Reperfusion
Source: PubMed Central journal article supplement — JAMA Netw Open. 2023 May 1;6(5):e2310213. doi: 10.1001/jamanetworkopen.2023.10213 (PMC10152307; doi:10.1001/jamanetworkopen.2023.10213), 2023-05-01
Supplement: jamanetwopen-e2310213-s003.pdf [file jamanetwopen-e2310213-s003.pdf]

## Data Sharing Statement

Faizy. Association Between Intravenous Thrombolysis and Clinical Outcomes Among Patients With Ischemic Stroke and Unsuccessful Mechanical Reperfusion. *JAMA Netw Open*. Published May 01, 2023. doi:10.1001/jamanetworkopen.2023.10213

### Data

**Data available:** No

### Additional Information

**Explanation for why data not available:** The data that support the findings of this study are available on reasonable request after approval of the ethics committee and all participating centers.
